# Supplementary material for: Systematic Review of the Psychological Impact of Memory Making on Parents following the death of a baby, child or stillborn infant in the neonatal or pediatric intensive care units or maternity ward
Source: Research Square preprint supplement (doi:10.21203/rs.3.rs-8189673/v1), 2025-12-31
Supplement: Supplementary file 1 [file f10751dc1f909613c041532b.docx]

**MEDLINE(R) ALL (Ovid)**1946 to May 21, 2024

| **#** | **Searches** | **Results** |
| --- | --- | --- |
| 1 | (memory adj2 mak*).ab,kf,ti. | 795 |
| 2 | (legacy adj2 service*).ab,kf,ti. | 24 |
| 3 | (memor* adj10 (legacy or rituali* or footprint* or foot print* or hand print* or handprint* or artwork* or songwriting* or song writing* or handmold* or hand mold* or memento* or bracelet* scrapbook* or lock of hair*)).ab,kf,ti. | 551 |
| 4 | or/1-3 | 1356 |
| 5 | (baby or babies or infant* or neonat* or child* or pediatric* or paediatirc* or fetus* or newborn* or stillbirth* or stillborn* or preterm* or premature*).ab,kf,ti. | 2749416 |
| 6 | 4 and 5 | 104 |
| 7 | limit 6 to dt=20231020-20241231 | 8 |

|  |
| --- |

**Embase Classic+Embase (Ovid)**1947 to 2024 May 21

| **#** | **Searches** | **Results** |
| --- | --- | --- |
| 1 | (memory adj2 mak*).ab,kf,ti. | 1043 |
| 2 | (legacy adj2 service*).ab,kf,ti. | 36 |
| 3 | (memor* adj10 (legacy or rituali* or footprint* or foot print* or hand print* or handprint* or artwork* or songwriting* or song writing* or handmold* or hand mold* or memento* or bracelet* scrapbook* or lock of hair*)).ab,kf,ti. | 625 |
| 4 | or/1-3 | 1679 |
| 5 | (baby or babies or infant* or neonat* or child* or pediatric* or paediatirc* or fetus* or newborn* or stillbirth* or stillborn* or preterm* or premature*).ab,kf,ti. | 3750934 |
| 6 | 4 and 5 | 194 |
| 7 | limit 6 to dt=20231020-20241231 [Limit not valid in Embase; records were retained] | 194 |
| 8 | limit 6 to dc=20231020-20241231 | 18 |

**CINAHL (EBSCO)** Wed, May 22, 2024 9:54:24 PM

| **#** | **Query** | **Results** |
| --- | --- | --- |
| S8 | S4 AND S5 Publication Date: 20231001- 20241231 | 5 |
| S7 | S4 AND S5 | 89 |
| S6 | S4 AND S5 | 89 |
| S5 | TI ( (baby or babies or infant* or neonat* or child* or pediatric* or paediatirc* or fetus* or newborn* or stillbirth* or stillborn* or preterm* or premature*) ) OR AB ( (baby or babies or infant* or neonat* or child* or pediatric* or paediatirc* or fetus* or newborn* or stillbirth* or stillborn* or preterm* or premature*) ) | 847,454 |
| S4 | S1 OR S2 OR S3 | 527 |
| S3 | TI ( (memor* N10 (legacy or rituali* or footprint* or foot print* or hand print* or handprint* or artwork* or songwriting* or song writing* or handmold* or hand mold* or memento* or bracelet* scrapbook* or lock of hair*)) ) OR AB ( (memor* N10 (legacy or rituali* or footprint* or foot print* or hand print* or handprint* or artwork* or songwriting* or song writing* or handmold* or hand mold* or memento* or bracelet* scrapbook* or lock of hair*)) ) | 102 |
| S2 | TI legacy N2 service* OR AB legacy N2 service* | 35 |
| S1 | TI (memory N2 mak*) OR AB (memory N2 mak*) | 402 |
| **Web of Science** May 22, 2024 | | | | |
| **#** | **Search Query** | **Results** | |
| 1 | (memory NEAR/2 mak*) (Title) OR (memory NEAR/2 mak*) (Abstract) | 4801 | |
| 2 | (legacy NEAR/2 service*) (Title) OR (legacy NEAR/2 service*) (Abstract) | 493 | |
| 3 | memor* NEAR/10 (legacy or ritual* or footprint* or "foot print*" or "hand print*" or handprint* or artwork* or songwriting* or "song writing*" or handmold* or "hand mold*" or memento* or bracelet* or scrapbook* or "lock of hair*"). (Title) OR memor* NEAR/10 (legacy or ritual* or footprint* or "foot print*" or "hand print*" or handprint* or artwork* or songwriting* or "song writing*" or handmold* or "hand mold*" or memento* or bracelet* or scrapbook* or "lock of hair*"). (Abstract) | 5858 | |
| 4 | #1 OR #2 OR #3 | 11023 | |
| 5 | (baby or babies or infant* or neonat* or child* or pediatric* or paediatirc* or fetus* or newborn* or stillbirth* or stillborn* or preterm* or premature*) (Title) OR (baby or babies or infant* or neonat* or child* or pediatric* or paediatirc* or fetus* or newborn* or stillbirth* or stillborn* or preterm* or premature*) (Abstract) | 3037822 | |
| 6 | #4 AND #5 | 320 | |
| 7 | #4 AND #5 Timespan: 2023-10-22 to 2024-12-31 | 15 | |
